# Supplementary material for: Group 2 innate lymphoid cells protect mouse heart from myocardial infarction injury via interleukin 5, eosinophils, and dendritic cells
Source: PubMed Central journal article supplement (PMC10153644; doi:10.1093/cvr/cvac144), 2022-09-05
Supplement: cvac144_supplementary_data.pdf [file cvac144_supplementary_data.pdf]

## Supplemental Materials

### **Group 2 innate lymphoid cells protect mouse heart from myocardial infarction injury via interleukin 5, eosinophils, and dendritic cells**

Tianxiao Liu,<sup>1,2,3#</sup> Zhaojie Meng,<sup>2#</sup> Jing Liu,<sup>2,3#</sup> Jie Li,<sup>2</sup> Yuanyuan Zhang,<sup>2,4</sup> Zhiyong Deng,<sup>2</sup> Songyuan Luo,<sup>2</sup> Minjie Wang,<sup>2</sup> Qin Huang,<sup>2</sup> Shuya Zhang,<sup>2,4</sup> Pauline Fendt,<sup>2</sup> Julie Devouassous,<sup>2</sup> Dazhu Li,<sup>3</sup> Andrew Neil James McKenzie,<sup>5</sup> Matthias Nahrendorf,<sup>6</sup> Peter Libby,<sup>2</sup> Junli Guo,<sup>2,4</sup> Guo-Ping Shi<sup>2</sup>

<sup>1</sup>Guangdong Provincial Geriatrics Institute, Guangdong Provincial People's Hospital, Guangdong Academy of Medical Sciences, Guangzhou 510080, China;

<sup>2</sup>Department of Medicine, Brigham and Women's Hospital and Harvard Medical School, Boston, MA 02115, USA

<sup>3</sup>Laboratory of Cardiovascular Immunology, Institute of Cardiology, Union Hospital, Tongji Medical College, Huazhong University of Science and Technology, Wuhan 430022, China

<sup>4</sup>Institute of Cardiovascular Research, Key Laboratory of Emergency and Trauma of Ministry of Education, Hainan Medical University, Haikou 570100, China

<sup>5</sup>Medical Research Council Laboratory of Molecular Biology, Cambridge, UK

<sup>6</sup>Center for Systems Biology, Massachusetts General Hospital, Harvard Medical School, Boston, MA 02114, USA

#These authors contributed equally to this study.

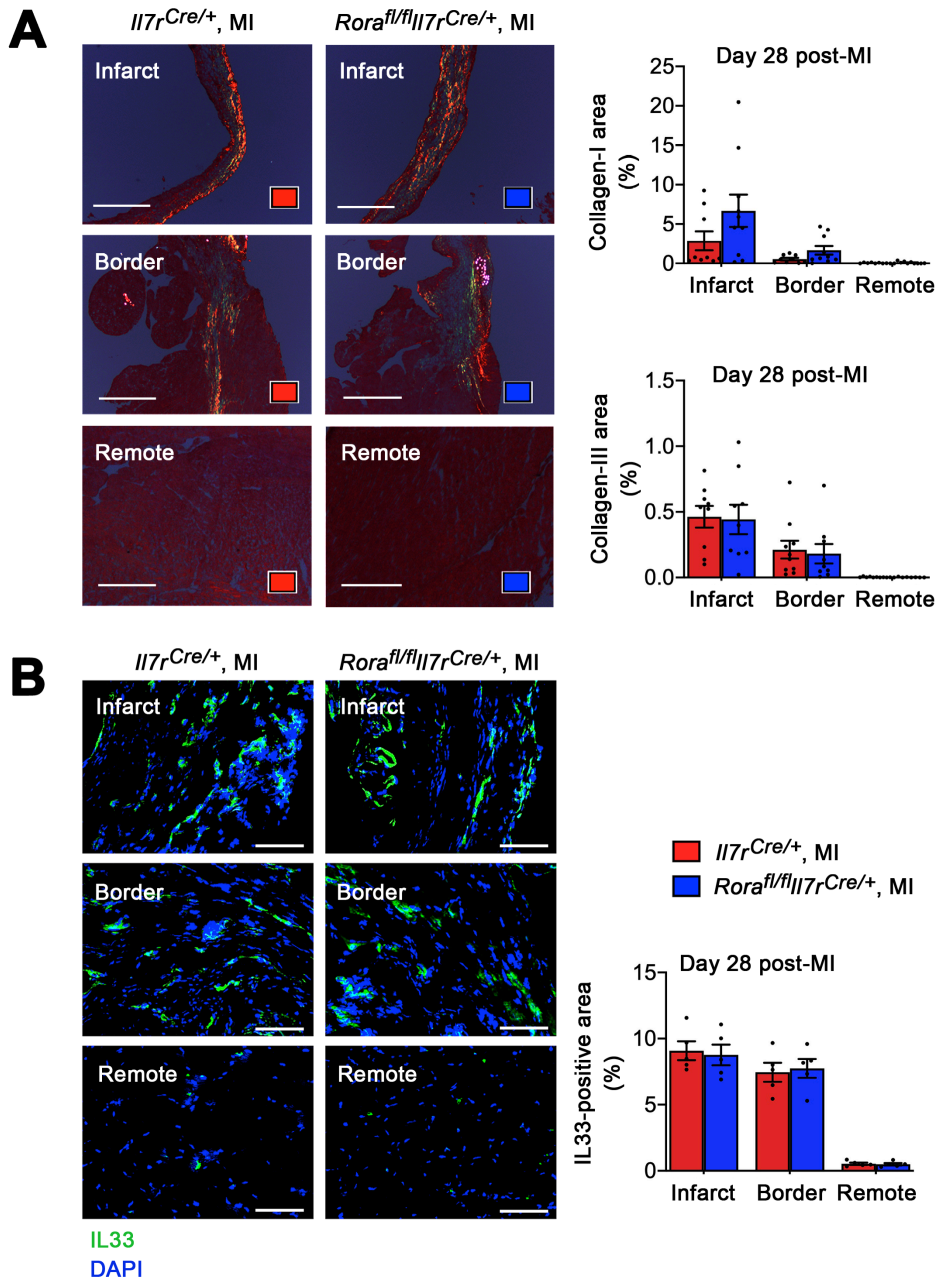

**Supplemental Figure S1.** Sirius red and immunofluorescent staining to detect collagen-I (red and orange) and collagen-III (green) (**A**) and IL33 expression (**B**) in the infarct, border, and remote regions of infarcted hearts from *Il7r<sup>Cre/+</sup>* and *Rora<sup>fl/fl</sup>Il7r<sup>Cre/+</sup>* mice at 28 days post-MI. Scale: 200  $\mu$ m in **A** and 50  $\mu$ m in **B**. Data are mean $\pm$ SEM. n=9~10 mice per group in **A** and n=5 mice per group in **B**, non-parametric Mann-Whitney *U* test followed by Bonferroni correction.



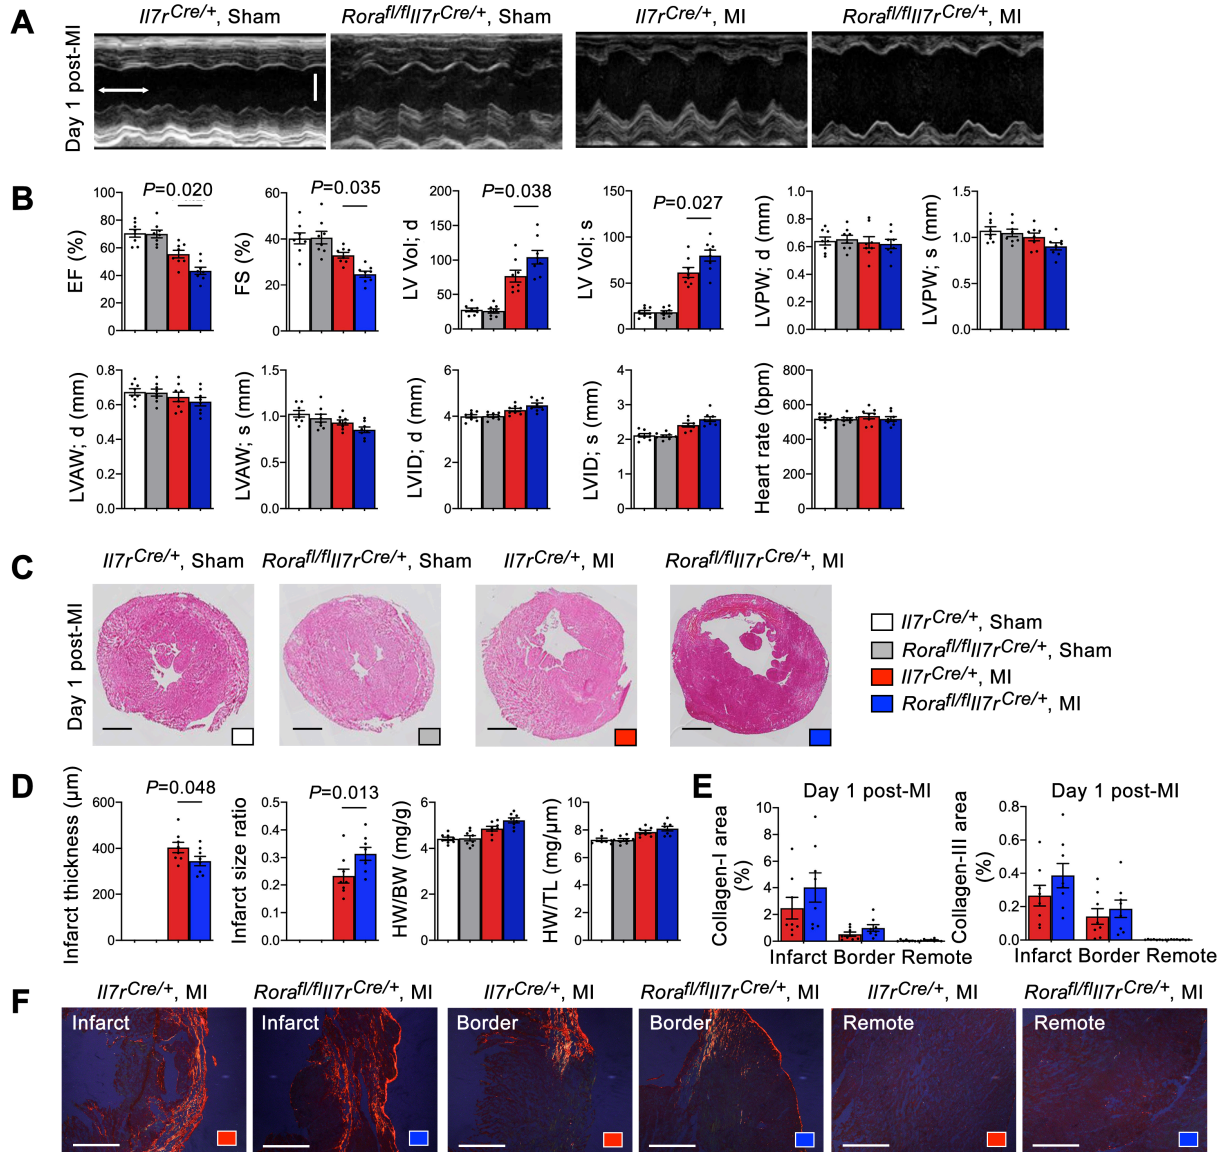

**Supplemental Figure S2.** ILC2 deficiency aggravates cardiac dysfunction at 1 day post-MI. **A.** Representative LV M-mode echocardiogram images of *I17r<sup>Cre/+</sup>* and *Rora<sup>fl/fl</sup>I17r<sup>Cre/+</sup>* mice post-MI or sham as indicated (time stamp: 100 ms, scale: 1.7 mm). **B.** Cardiac functions post-MI or sham in different groups of mice. **C/D.** Infarct thickness, infarct size ratio and representative images (scale: 1.50 mm), BW/HW, and BW/TL post-MI or sham in different groups of mice. **E/F.** Sirius red staining was used to quantify collagen-I (red and orange) and collagen-III (green) in infarct, media, and remote regions from *I17r<sup>Cre/+</sup>* and *Rora<sup>fl/fl</sup>I17r<sup>Cre/+</sup>* mice post-MI. Representative images are shown in **C** and **F** (scale: 200  $\mu\text{m}$ ). Data are mean $\pm$ SEM. n=7~10 mice per sham group, n=15~20 mice per MI group, one-way ANOVA test followed by a post hoc Tukey's test (**B** and **D**), or non-parametric Mann-Whitney *U* test followed by Bonferroni correction (**E**).

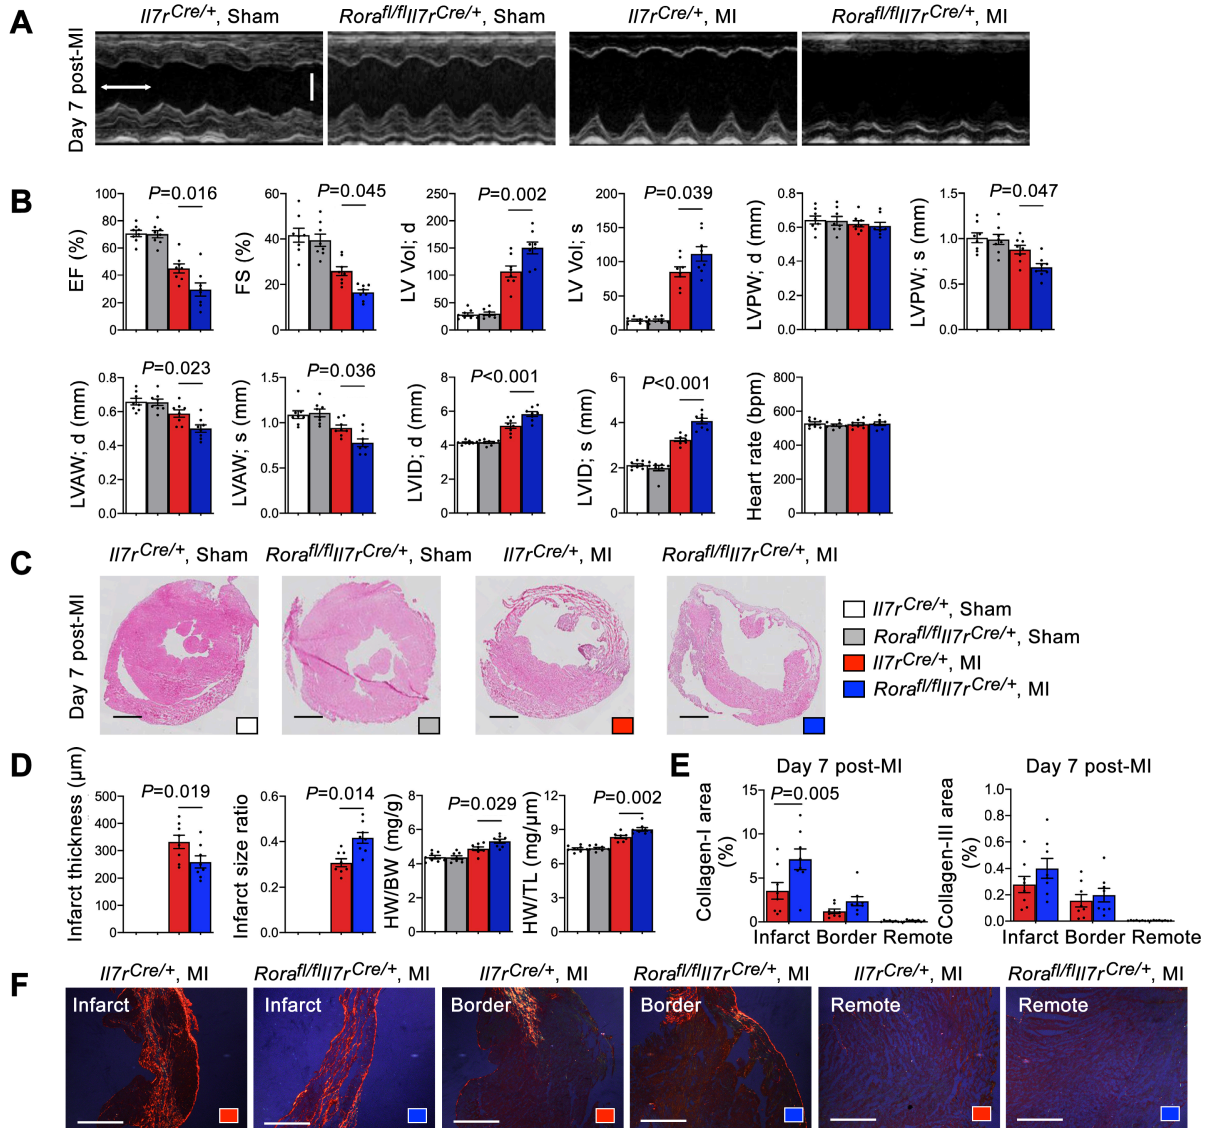

**Supplemental Figure S3.** ILC2 deficiency aggravates cardiac dysfunction at 7 days post-MI. **A.** Representative LV M-mode echocardiogram images of *Il7r<sup>Cre/+</sup>* and *Rora<sup>fl/fl</sup>Il7r<sup>Cre/+</sup>* mice post-MI or sham as indicated (time stamp: 100 ms, scale: 1.7 mm). **B.** Cardiac functions post-MI or sham in different groups of mice. **C/D.** Infarct thickness, infarct size ratio and representative images (scale: 1.50 mm), BW/HW, and BW/TL post-MI or sham in different groups of mice. **E/F.** Sirius red staining was used to quantify collagen-I (red and orange) and collagen-III (green) in infarct, media, and remote regions from *Il7r<sup>Cre/+</sup>* and *Rora<sup>fl/fl</sup>Il7r<sup>Cre/+</sup>* mice post-MI. Representative images are shown in **C** and **F** (scale: 200  $\mu\text{m}$ ). Data are mean $\pm$ SEM. n=7~10 mice per sham group, n=15~20 mice per MI group, one-way ANOVA test followed by a post hoc Tukey's test (**B** and **D**), or non-parametric Mann-Whitney *U* test followed by Bonferroni correction (**E**).

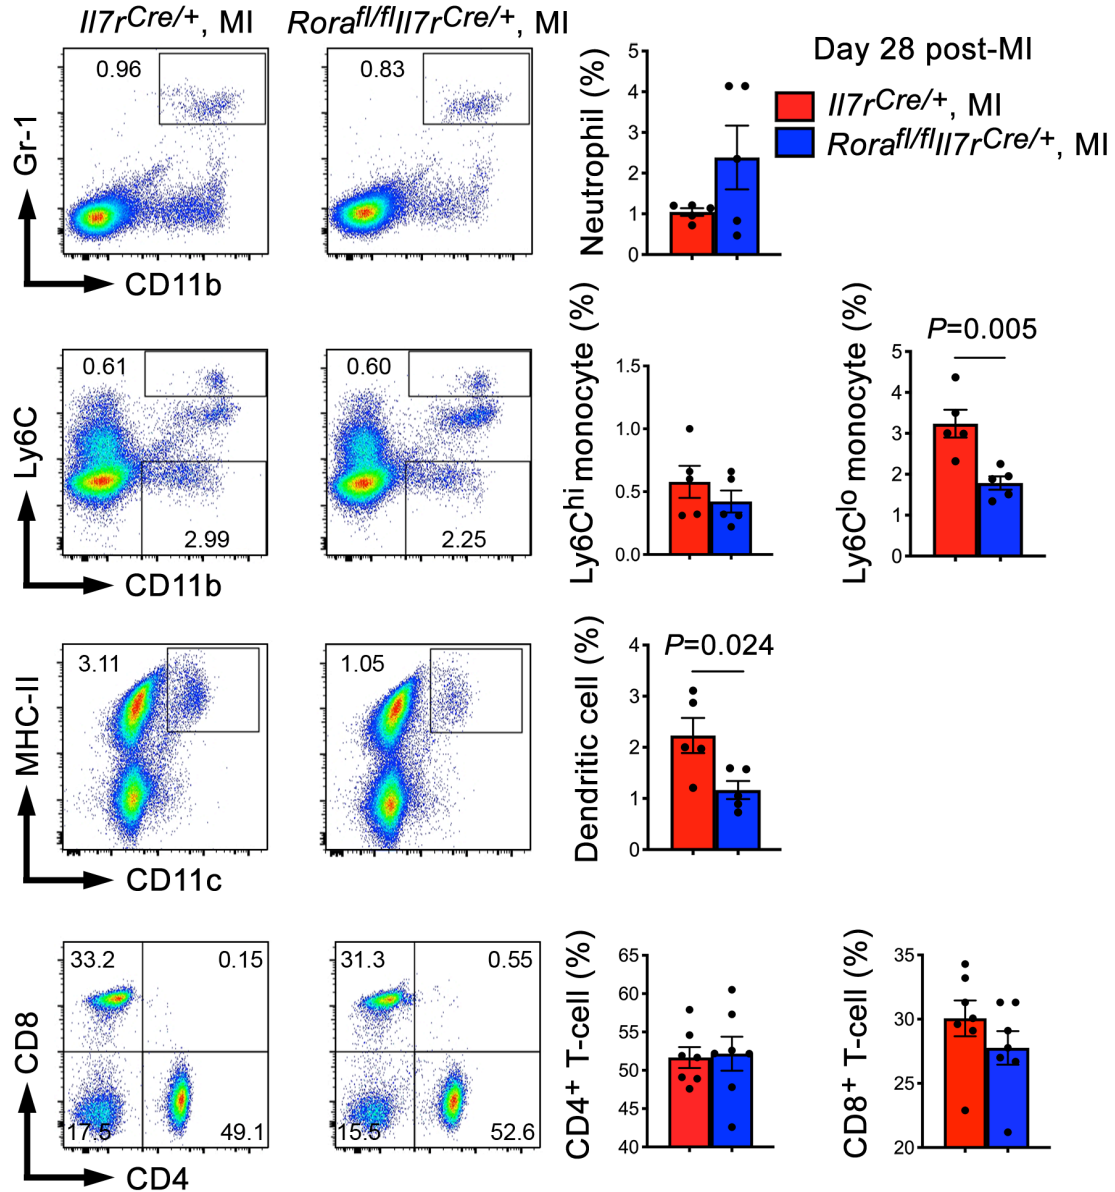

**Supplemental Figure S4.** FACS quantification of spleen immune cells in *Il7r*<sup>Cre/+</sup> and *Rora*<sup>fl/fl</sup>*Il7r*<sup>Cre/+</sup> mice at 28 days post-MI. CD45<sup>+</sup>CD11b<sup>+</sup>Gr-1<sup>+</sup> neutrophils, CD45<sup>+</sup>CD11b<sup>+</sup>Ly6C<sup>hi</sup> monocytes, CD45<sup>+</sup>CD11b<sup>+</sup>Ly6C<sup>lo</sup> monocytes, CD45<sup>+</sup>CD11c<sup>+</sup>MHC-II<sup>+</sup> dendritic cells, CD45<sup>+</sup>CD4<sup>+</sup> and CD45<sup>+</sup>CD8<sup>+</sup> T cells from *Il7r*<sup>Cre/+</sup> and *Rora*<sup>fl/fl</sup>*Il7r*<sup>Cre/+</sup> mice. Representative FACS images are shown to the left. Data are mean±SEM. n=5~7 mice per group, non-parametric Mann-Whitney *U* test followed by Bonferroni correction.

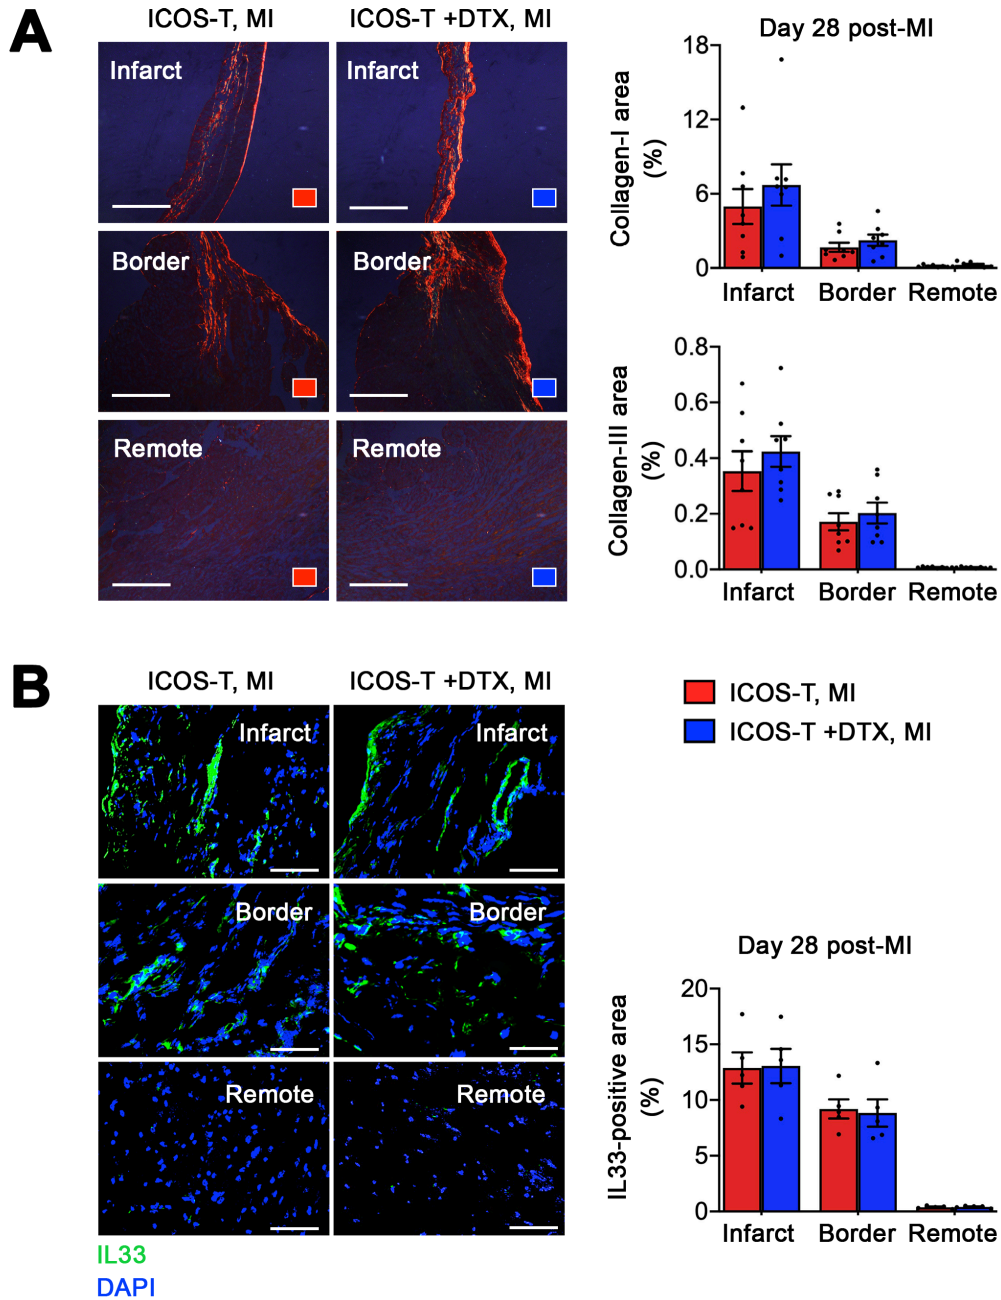

**Supplemental Figure S5.** Sirius red and immunofluorescent staining to detect collagen-I (red and orange) and collagen-III (green) (**A**) and IL33 expression (**B**) in the infarct, border, and remote regions of infarcted hearts from ICOS-T mice treated with or without DTX at 28 days post-MI. Scale: 200  $\mu$ m in **A** and 50  $\mu$ m in **B**. Data are mean $\pm$ SEM. n=8 mice per group in **A** and n=5 mice per group in **B**, non-parametric Mann-Whitney *U* test followed by Bonferroni correction.



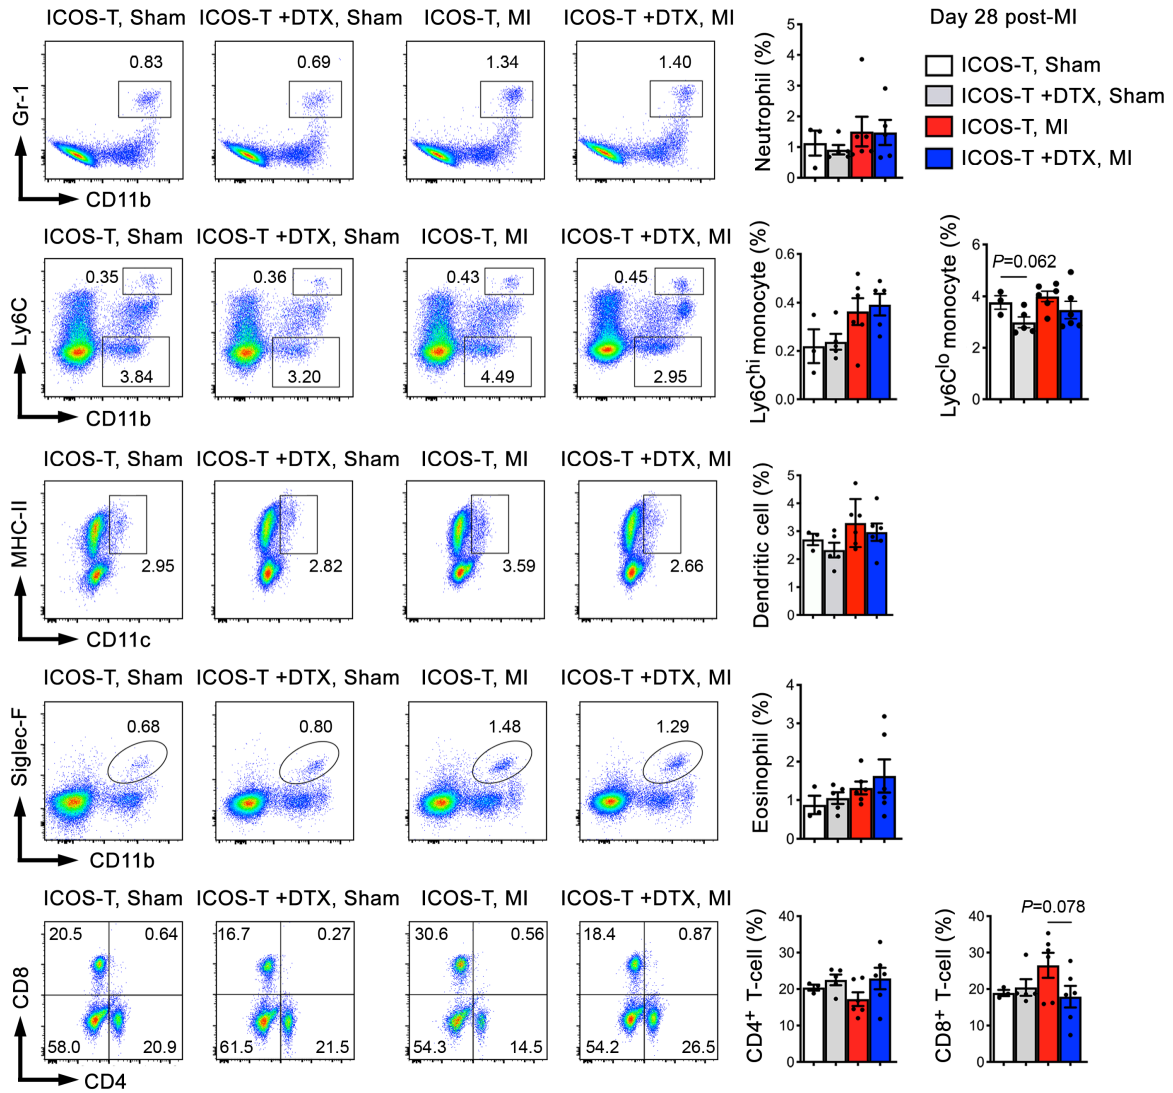

**Supplemental Figure S6.** FACS quantification of splenic immune cells in ICOS-T mice with different treatments as indicated at 28 days post-MI.  $CD45^+CD11b^+Gr-1^+$  neutrophils,  $CD45^+CD11b^+Ly6C^{hi}$  monocytes,  $CD45^+CD11b^+Ly6C^{lo}$  monocytes,  $CD45^+CD11c^+MHC-II^+$  dendritic cells,  $CD45^+CD11b^+Siglec-F^+$  EOS, and  $CD45^+CD4^+$  and  $CD45^+CD8^+$  T cells. Representative FACS images are shown to the left. Data are mean $\pm$ SEM. n=3~6 mice per group, one-way ANOVA test followed by a post hoc Tukey's test.

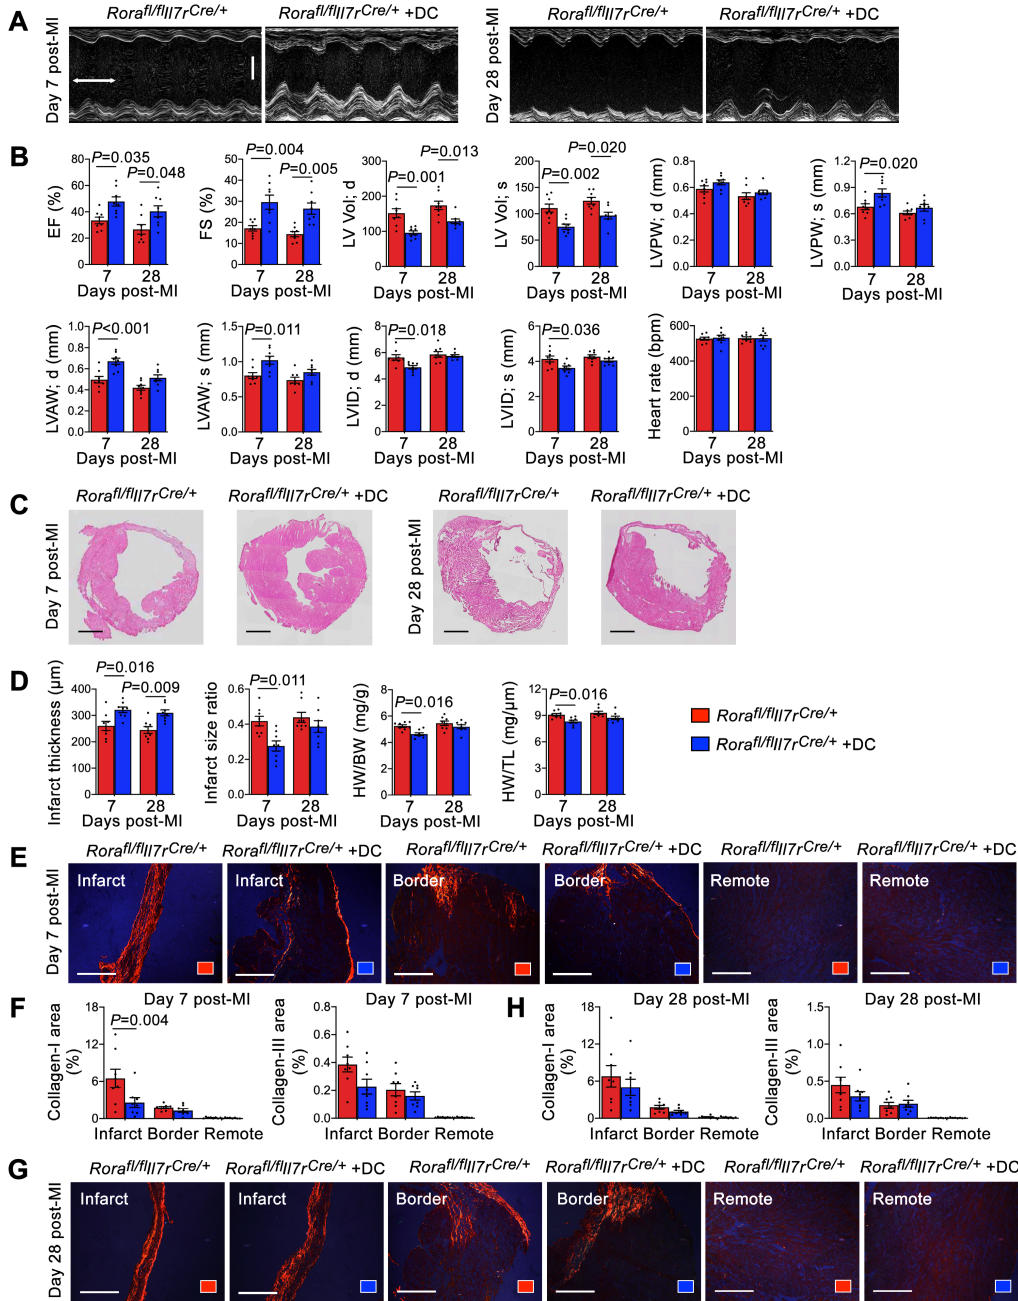

**Supplemental Figure S7.** Donor DC from WT mice protects cardiac functions in *Rora<sup>fl/fl</sup>Il7r<sup>Cre/+</sup>* mice at 7 and 28 days post-MI. **A.** Representative LV M-mode echocardiogram images (time stamp: 100 ms, scale: 1.7 mm). **B.** Cardiac functions and heart rates. **C/D.** Infarct thickness, infarct size ratio, HW/BW, and HW/TL. Representative H&E staining images are shown in **C**. Scale: 1.50 mm. **E/F.** Sirius red staining of collagen-I (red and orange) and collagen-III (green) in infarct, media, and remote regions from *Rora<sup>fl/fl</sup>Il7r<sup>Cre/+</sup>* mice at 7 days post-MI. **G/H.** Sirius red staining of collagen-I and collagen-III in infarct, media, and remote regions from *Rora<sup>fl/fl</sup>Il7r<sup>Cre/+</sup>* mice at 28 days post-MI. Representative images are shown in **E** and **G** (scale: 200  $\mu$ m). Data are mean $\pm$ SEM. n=8 mice per group, non-parametric Mann-Whitney *U* test followed by Bonferroni correction.

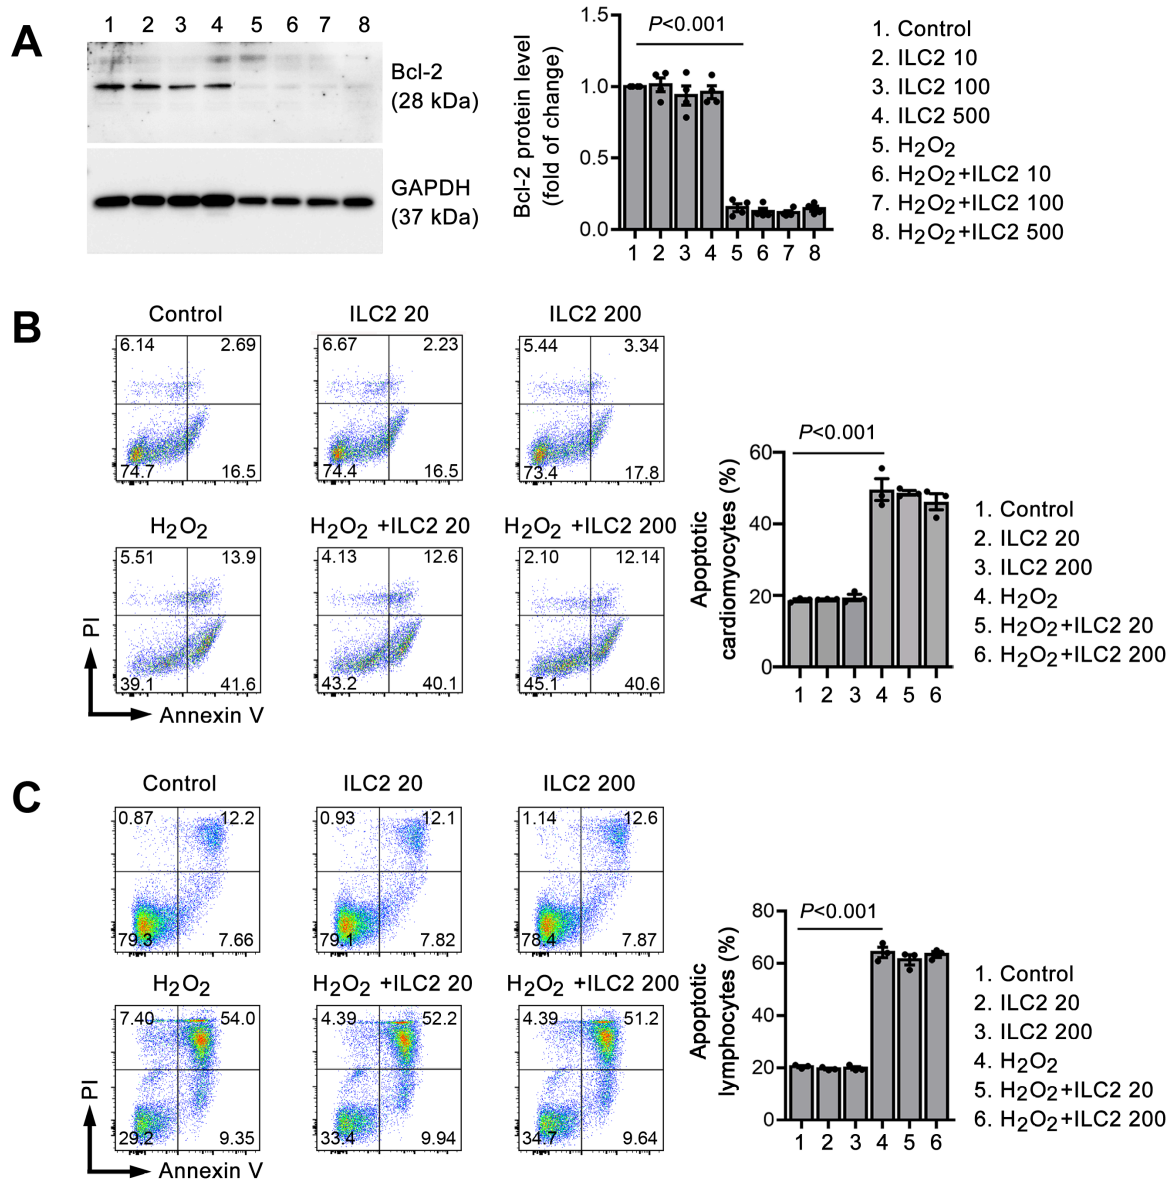

**Supplemental Figure S8.** ILC2 do not affect cardiomyocyte and lymphocyte death **A.** Immunoblot detected Bcl-2 expression in adult mouse cardiomyocytes treated with ILC2 lysates (equivalent to 0,  $10^3$ ,  $10^4$  and  $5 \times 10^4$  ILC2/ml) with or without H<sub>2</sub>O<sub>2</sub> (100  $\mu$ M) for 4 hrs. Representative immunoblots are shown to the left.  $n=3-4$  independent experiments. **B/C.** FACS analysis of mouse cardiomyocyte and lymphocyte apoptosis. Cardiomyocytes (**B**) and splenic lymphocytes (**C**) were treated with ILC2 lysates (equivalent to 0,  $2 \times 10^3$ ,  $2 \times 10^4$  ILC2/ml) with or without H<sub>2</sub>O<sub>2</sub> (100  $\mu$ M) for 4 hrs. Representative FACS images are shown on the left.  $n=3$  independent experiments. Data are mean $\pm$ SEM, one-way ANOVA test followed by a post hoc Tukey's test.

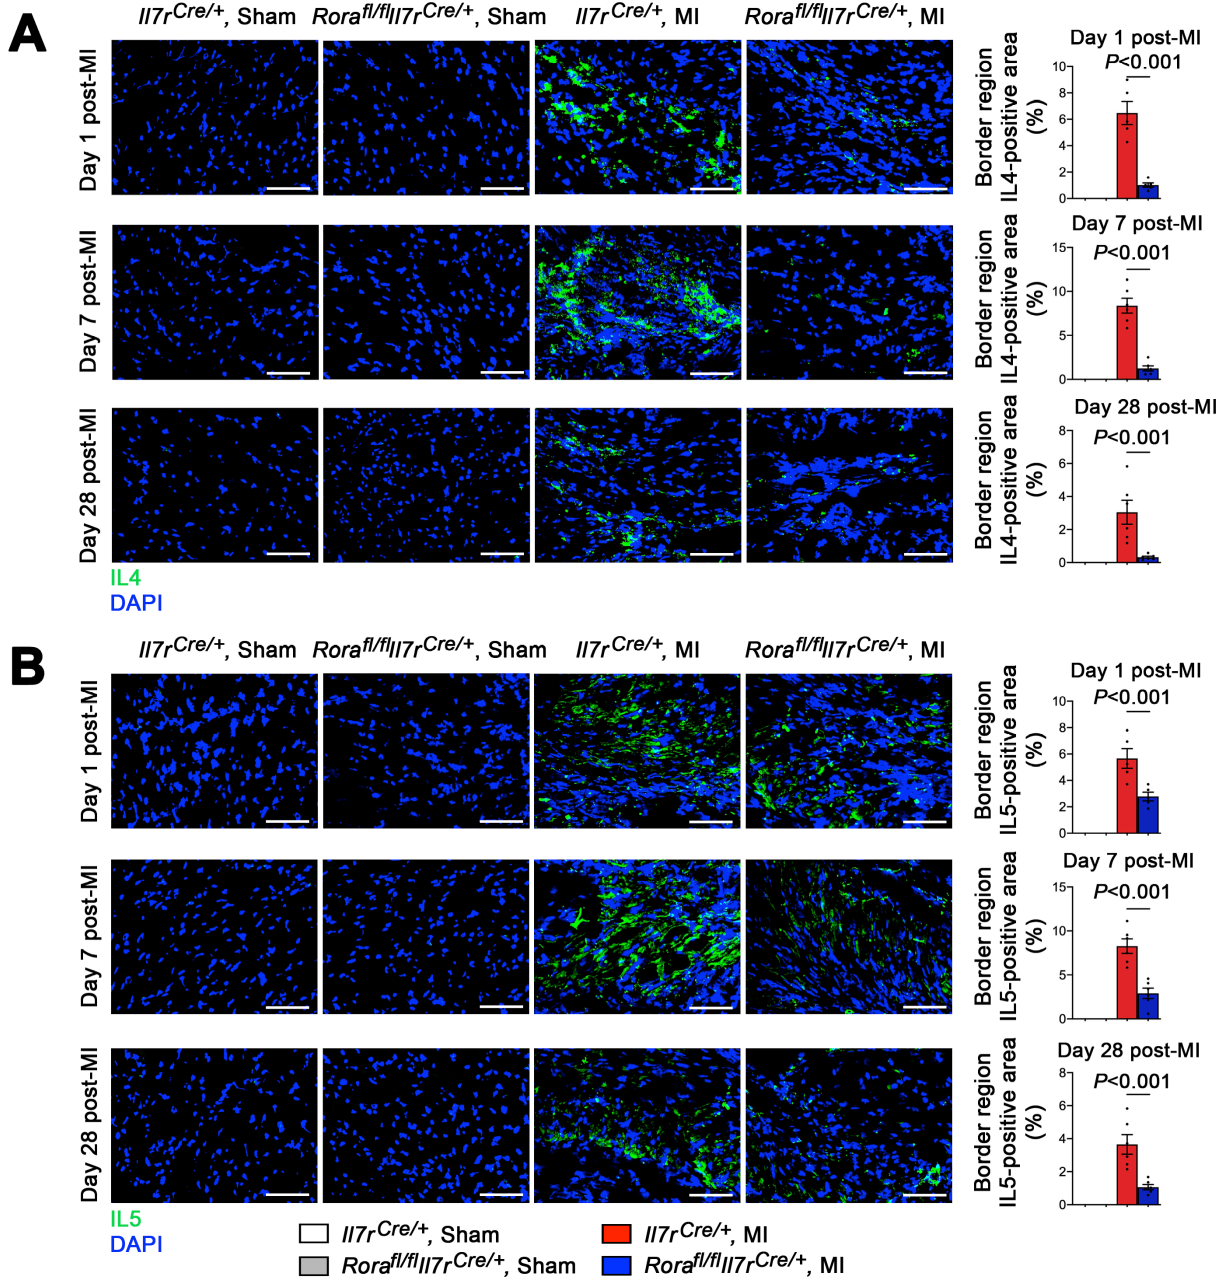

**Supplemental Figure S9.** Immunofluorescent staining, confocal imaging, and quantification of myocardial border region IL4 and IL5 levels in *Il7r<sup>Cre/+</sup>* and *Rora<sup>fl/fl</sup>Il7r<sup>Cre/+</sup>* mice at 1, 7, and 28 days post-MI. **A.** IL4. **B.** IL5. Scale: 50  $\mu$ m. Data are mean  $\pm$  SEM. n=5 mice per group, non-parametric Mann-Whitney *U* test followed by Bonferroni correction.



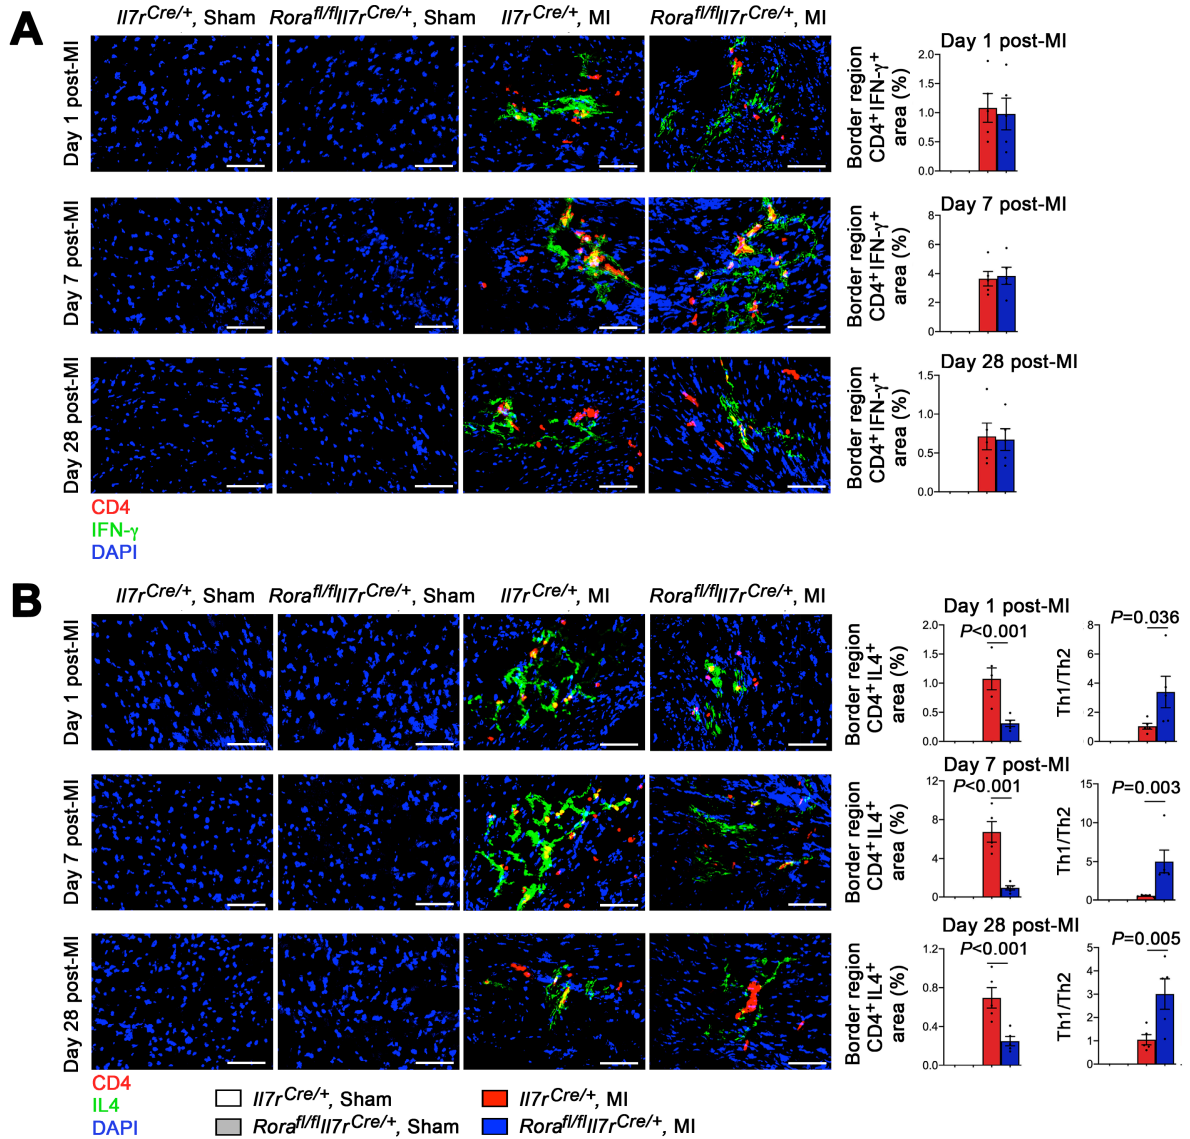

**Supplemental Figure S10.** Immunofluorescent double staining, confocal imaging, and quantification of myocardial border region Th1 and Th2 cells in *Il7r<sup>Cre/+</sup>* and *Rora<sup>fl/fl</sup>Il7r<sup>Cre/+</sup>* mice at 1, 7, and 28 days post-MI. **A.** CD4<sup>+</sup>IFN- $\gamma$ <sup>+</sup> Th1 cells. **B.** CD4<sup>+</sup>IL4<sup>+</sup> Th2 cells and Th1/Th2 ratio. Scale: 50  $\mu$ m. Data are mean $\pm$ SEM. n=5 mice per group, non-parametric Mann-Whitney *U* test followed by Bonferroni correction.

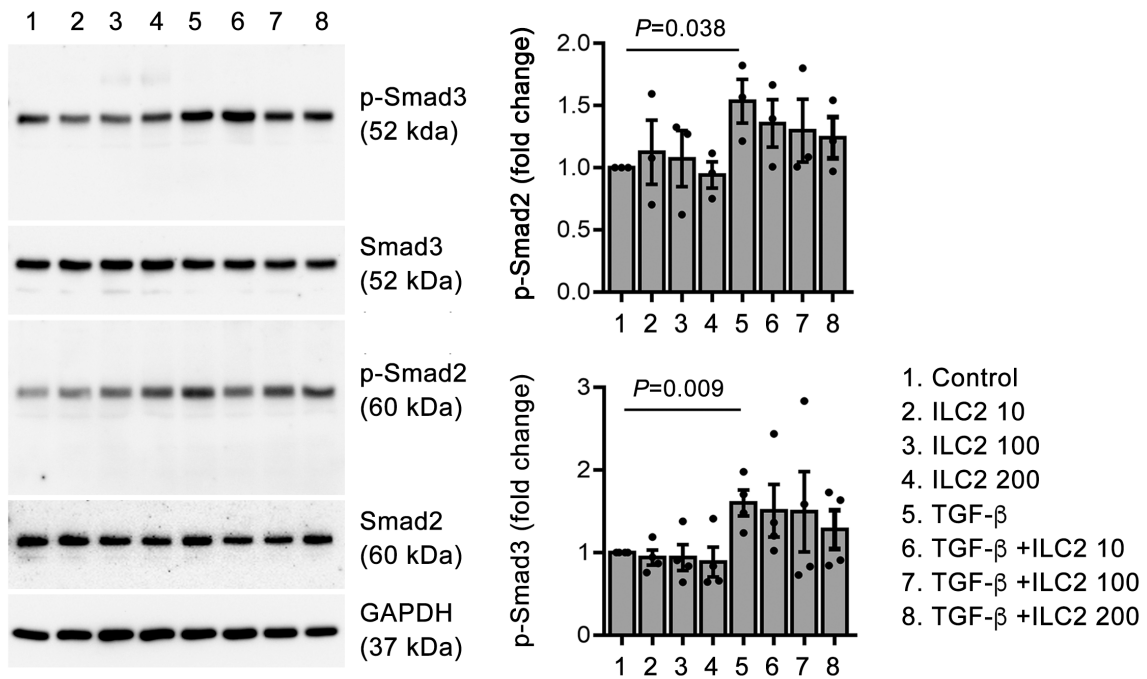

**Supplemental Figure S11.** ILC2 do not affect cardiac fibroblast Smad signaling. Immunoblots detected p-Smad2/3 and total Smad2/3 in mouse cardiac fibroblasts treated with ILC2 lysates (equivalent to 0,  $10^3$ ,  $10^4$  and  $2 \times 10^4$  ILC2/ml) with or without TGF- $\beta$  (10 ng/ml) for 30 min. Representative immunoblots are shown to the left.  $n=5-7$  independent experiments. Data are mean $\pm$ SEM, one-way ANOVA test followed by a post hoc Tukey's test.
